# Supplementary material for: Efficient Mimics for Elucidating Zaxinone Biology and Promoting Agricultural Applications
Source: PubMed Central journal article supplement (PMC7656291; doi:10.1016/j.molp.2020.08.009), 2020-11-02
Supplement: mmc2.pdf [file mmc2.pdf]

# Efficient Mimics for Elucidating Zaxinone Biology and Promoting Agricultural Applications

Jian You Wang, Muhammad Jamil, Pei-Yu Lin, Tsuyoshi Ota, Valentina Fiorilli, Mara Novero, Randa A. Zarban, Boubacar A. Kountche, Ikuo Takahashi, Claudio Martínez, Luisa Lanfranco, Paola Bonfante, Angel R. de Lera, Tadao Asami and Salim Al-Babili

## Supplemental Document 2

The synthesis of the (iso)zaxinone compounds **1-4** followed the general strategies used for the synthesis of retinoids and carotenoids as recently reviewed. (Alvarez et al., 2014)

**Synthesis of isozaxinone 1 (4-dihydrotrispurin B).** (Gessler et al., 2002).

(*E*)-Iodoalkenylcyclohexenol **5** was protected as silyl ether **6** in 83% yield upon treatment with TBDMSCl and imidazole, (Fontán et al., 2011) and the dienyl iodide was subjected to a Stille cross-coupling reaction with (*E*)-alkenylstannane **7** catalyzed by  $\text{Pd}_2\text{dba}_3 \cdot \text{CHCl}_3$  and  $\text{AsPh}_3$  in the presence of  $\text{LiCl}$  and using NMP as solvent to provide, in 77% yield, trienol **8**. (Ito et al., 1990) Oxidation of the allylic alcohol with  $\text{MnO}_2$  and  $\text{Na}_2\text{CO}_3$  as described for other analogs (Fontán et al., 2011) gave rise to trienal **9**. Treatment of trienal **9** with acetone in basic media afforded the aldol condensation product trienylketone **10** in 65% yield, (Tanumihardjo, 2001) which was deprotected to provide the secondary alcohol **1** (isoxaxinone, 4-dihydrotrispurin B) (Gessler et al., 2002) upon treatment with  $\text{HF} \cdot \text{py}$ . Having a hydroxyl group at the allylic position contributed to the instability of this compound, which requires careful handling.

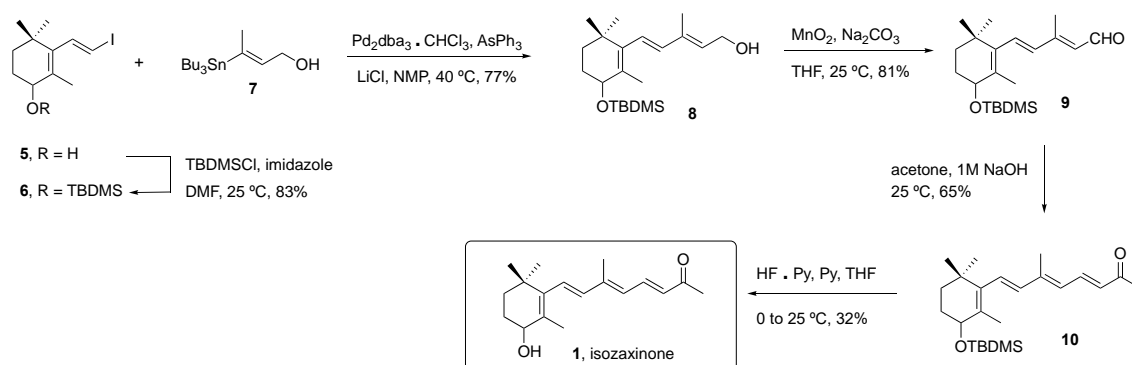

**Scheme 2.** Total synthesis of racemic isozaxinone.

### Synthesis of isozaxinone **1** and analogues:

Enantiopure cyclohexenyltriflate **11** was prepared from TBS-protected enantiopure actinol,(Fontán et al., 2011; Ito et al., 1990; Yamano and Ito, 1993; Yamano et al., 1995) and subjected to Stille cross-coupling reaction with (2*Z*,4*E*)-stannanediol **12** to afford trienol **13**. Allylic oxidation using MnO<sub>2</sub> and Na<sub>2</sub>CO<sub>3</sub> took place uneventfully and provided trienal **14** in quantitative yield.(Domínguez et al., 2006) Aldol condensation with acetone as described above (Tanumihardjo, 2001) led in 79% yield the corresponding tetraenone **15**, which proved to be highly unstable and partly isomerized to the all-*trans* isomer. In fact, upon deprotection with TBAF at room temperature, a mixture of **2** and **3** in a 1:1 ratio was obtained.

A more efficient route to the *trans* isomer present in zaxinol **4** was followed along the same steps, using instead the (*E,E*)-dienylstannane **16**, with the intermediacy of **17** and trienal **18** obtained in 96% yield from trienol **17** with MnO<sub>2</sub> and Na<sub>2</sub>CO<sub>3</sub> (Fontán et al., 2011). Aldol condensation as for the *Z* isomer (Tanumihardjo, 2001) provided all-*E*-tetraenone **19**. Reduction with NaBH<sub>4</sub> in the presence of CeCl<sub>3</sub> · 7H<sub>2</sub>O afforded tetraenol **20** in 60% yield, the deprotection of which (TBAF, THF, rt, 43%) gave rise to unstable tetraene-diol zaxinol **4**.

### Synthesis of O-Methylzaxinone

Enantiopure (*R*)-2-iodo-5-methoxy-1,3,3-trimethylcyclohex-1-ene **21** was prepared from enantiopure actinol and subjected to Stille cross-coupling reaction with (2*E*,4*E*)-dienylstannane **18** to afford trienol **22**. Allylic oxidation using MnO<sub>2</sub> and Na<sub>2</sub>CO<sub>3</sub> took place uneventfully and provided trienal **23** in 53% yield.(Domínguez et al., 2006) Aldol condensation with acetone as described above (Tanumihardjo, 2001) led in 74% yield to the corresponding *O*-methylzaxinone **24**.

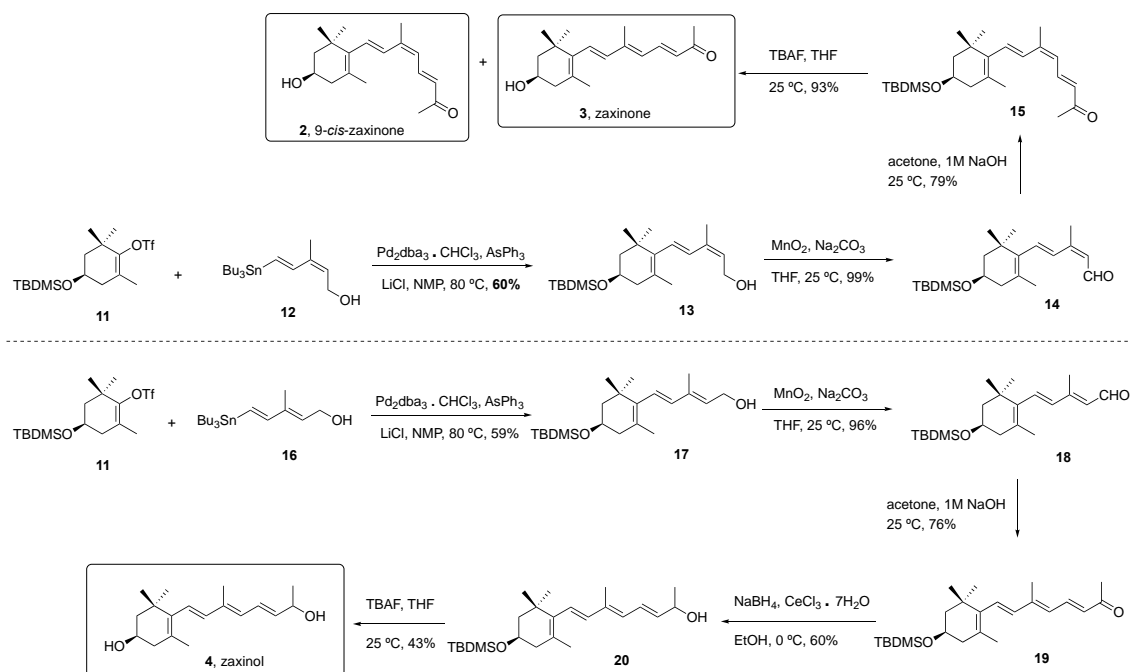

**Scheme 2.** Total synthesis of enantiopure zaxinone and analogues.

**(*E*)-*tert*-Butyl((3-(2-iodovinyl)-2,4,4-trimethylcyclohex-2-en-1-yl)oxy)dimethylsilane **6**.**(Fontán et al., 2011)

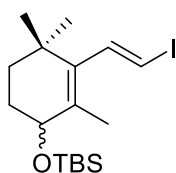

To a solution of (*E*)-3-(2-iodovinyl)-2,4,4-trimethylcyclohex-2-en-1-ol **5** (0.61 g, 2.10 mmol) in DMF (10 mL) were added imidazole (0.17 g, 2.52 mmol) and TBSCl (0.38 g, 2.52 mmol). The resulting mixture was stirred at  $25^\circ\text{C}$  for 12h.  $\text{H}_2\text{O}$  was added and the mixture was extracted with  $\text{EtOAc}$  (3x). The combined organic layers were dried over  $\text{Na}_2\text{SO}_4$  and the solvent was evaporated. The residue was purified by column chromatography (silica gel, from 97:3 *n*-hexane/ $\text{Et}_3\text{N}$  to 98:2 *n*-hexane/ $\text{EtOAc}$ ), to afford 0.66 g (77%) of a yellow oil identified as (*E*)-*tert*-butyl((3-(2-iodovinyl)-2,4,4-trimethylcyclohex-2-en-1-yl)oxy)dimethylsilane **6**.  $^1\text{H NMR}$  (400.13 MHz,  $\text{C}_6\text{D}_6$ ):  $\delta$  6.92 (d,  $J = 14.9$  Hz, 1H), 5.83 (d,  $J = 14.9$  Hz, 1H), 3.80 (appt,  $J = 5.5$  Hz, 1H), 1.67 (s, 3H), 1.63 – 1.51 (m, 3H), 1.23 – 1.17 (m, 1H), 0.98 (s, 9H), 0.85 (s, 3H), 0.80 (s, 3H), 0.07 (s, 3H), 0.06 (s, 3H) ppm.  $^{13}\text{C NMR}$  (100.62 MHz,  $\text{C}_6\text{D}_6$ ):  $\delta$  143.9 (d), 141.4 (s),

132.9 (s), 79.8 (d), 71.1 (d), 35.2 (t), 34.3 (s), 29.5 (t), 28.3 (q), 28.0 (q), 26.1 (q, 3x), 18.7 (q), 18.3 (s), -4.0 (q), -4.5 (q) ppm.

**(2E,4E)-5-(3-((tert-Butyldimethylsilyl)oxy)-2,6,6-trimethylcyclohex-1-en-1-yl)-3-methylpenta-2,4-dien-1-ol 8.** (Haag and Eugster, 1982)

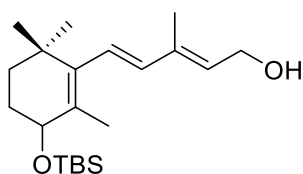

A solution of (*E*)-tert-butyl((3-(2-iodovinyl)-2,4,4-trimethylcyclohex-2-en-1-yl)oxy)dimethylsilane **6** (0.25 g, 0.61 mmol) in degassed NMP (5 mL) was added to a solution of Pd<sub>2</sub>(dba)<sub>3</sub>CHCl<sub>3</sub> (31 mg, 0.03 mmol) and AsPh<sub>3</sub> (75 mg, 0.24 mmol) in NMP (1 mL). After stirring for 10 min, a solution of (*E*)-3-(tributylstannyl)but-2-en-1-ol **7** (285 mg, 0.79 mmol) in NMP (1 mL) and LiCl (78 mg, 1.83 mmol) were added and the mixture was stirred for 23h at 40 °C. An aqueous solution of KF was added and the mixture was stirred for 10 min and then extracted with Et<sub>2</sub>O (3x). The combined organic layers were washed with H<sub>2</sub>O (3x), dried over Na<sub>2</sub>SO<sub>4</sub> and the solvent was evaporated. The residue was purified by column chromatography (silica gel, from 97:3 *n*-hexane/Et<sub>3</sub>N to 80:20 *n*-hexane/EtOAc), to afford 139 mg (65%) of a yellow oil identified as (2*E*,4*E*)-5-(3-((tert-butyl dimethylsilyl)oxy)-2,6,6-trimethylcyclohex-1-en-1-yl)-3-methylpenta-2,4-dien-1-ol **8**. <sup>1</sup>H NMR (400.13 MHz, C<sub>6</sub>D<sub>6</sub>): δ 6.17 (d, *J* = 16.3 Hz, 1H), 6.11 (d, *J* = 16.3 Hz, 1H), 5.33 (t, *J* = 6.7 Hz, 1H), 4.06 - 3.94 (m, 3H), 1.95 (s, 3H), 1.83 - 1.68 (m, 3H), 1.62 (s, 3H), 1.44 - 1.31 (m, 1H), 1.07 (s, 3H), 1.04 (s, 3H), 1.02 (s, 9H), 0.13 (s, 3H), 0.12 (s, 3H) ppm. <sup>13</sup>C NMR (100.62 MHz, C<sub>6</sub>D<sub>6</sub>): δ 140.6 (s), 138.7 (d), 135.5 (s), 131.1 (d), 128.2 (s), 126.2 (d), 71.5 (d), 59.4 (t), 35.5 (t), 34.9 (s), 29.8 (t), 28.8 (q), 28.4 (q), 26.2 (q, 3x), 18.9 (q), 18.4 (s), 12.4 (q), -3.9 (q), -4.4 (q) ppm.

**(2E,4E)-5-(3-((tert-Butyldimethylsilyl)oxy)-2,6,6-trimethylcyclohex-1-en-1-yl)-3-methylpenta-2,4-dienal 9.** (Katsuta et al., 1994)

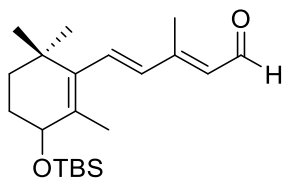

To a solution of  $\text{MnO}_2$  (0.63 g, 7.2 mmol) and  $\text{Na}_2\text{CO}_3$  (0.76 g, 7.2 mmol) in THF (6 mL) was added (2*E*,4*E*)-5-(3-((*tert*-butyldimethylsilyl)oxy)-2,6,6-trimethylcyclohex-1-en-1-yl)-3-methylpenta-2,4-dien-1-ol **8** (0.14 g, 0.40 mmol). The mixture was stirred for 1h at room temperature, and then filtered through Celite<sup>®</sup> and the solvent was evaporated. The mixture was purified by column chromatography (silica gel, from 97:3 *n*-hexane/ $\text{Et}_3\text{N}$  to 95:5 *n*-hexane/ $\text{EtOAc}$ ), to afford 0.112 g (81%) of a yellow oil identified as (2*E*,4*E*)-5-(3-((*tert*-butyldimethylsilyl)oxy)-2,6,6-trimethylcyclohex-1-en-1-yl)-3-methylpenta-2,4-dienal **9**. <sup>1</sup>H NMR (400.13 MHz,  $\text{C}_6\text{D}_6$ ):  $\delta$  9.98 (d,  $J = 7.7$  Hz, 1H), 6.38 (d,  $J = 16.0$  Hz, 1H), 5.97 (d,  $J = 16.2$  Hz, 1H), 5.86 (d,  $J = 7.7$  Hz, 1H), 3.94 (appt,  $J = 5.2$  Hz, 1H), 1.79 (s, 3H), 1.75 – 1.64 (m, 6H), 1.32 (ddd,  $J = 11.9, 7.9, 3.3$  Hz, 1H), 1.01 (s, 9H), 0.96 (s, 3H), 0.92 (s, 3H), 0.12 (s, 3H), 0.11 (s, 3H) ppm. <sup>13</sup>C NMR (100.62 MHz,  $\text{C}_6\text{D}_6$ ):  $\delta$  190.1 (d), 152.7 (s), 139.7 (s), 137.4 (d), 134.2 (d), 133.3 (s), 129.9 (d), 71.3 (d), 35.5 (t), 34.9 (s), 29.6 (t), 28.7 (q), 28.3 (q), 26.4 (q, 3x), 18.8 (q), 18.4 (s), 12.4 (q), -3.9 (q), -4.5 (q) ppm.

**(3*E*,5*E*,7*E*)-8-(3-((*tert*-Butyldimethylsilyl)oxy)-2,6,6-trimethylcyclohex-1-en-1-yl)-6-methylocta-3,5,7-trien-2-one **10**.**

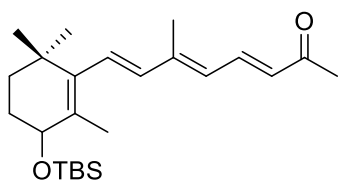

To a solution of (2*E*,4*E*)-5-(3-((*tert*-butyldimethylsilyl)oxy)-2,6,6-trimethylcyclohex-1-en-1-yl)-3-methylpenta-2,4-dienal **9** (0.11 g, 0.32 mmol) in acetone (1.6 mL) was added NaOH (0.028 mL, 1M in  $\text{H}_2\text{O}$ , 0.028 mmol) and the mixture was stirred for 12h at 25 °C. Then, water was added and the mixture was extracted with  $\text{Et}_2\text{O}$  (3x). The combined organic layers were dried over  $\text{Na}_2\text{SO}_4$  and the solvent was evaporated. The residue was purified by column chromatography (silica gel, from 97:3 *n*-hexane/ $\text{Et}_3\text{N}$  to 95:5 *n*-hexane/ $\text{EtOAc}$ ), to afford 81 mg (65%) of a yellow oil identified as (3*E*,5*Z*,7*E*)-8-(3-((*tert*-butyldimethylsilyl)oxy)-2,6,6-trimethylcyclohex-1-en-1-yl)-6-methylocta-3,5,7-

trien-2-one **10**.  $^1\text{H NMR}$  (400.13 MHz,  $\text{C}_6\text{D}_6$ ):  $\delta$  7.52 (dd,  $J = 15.2, 11.8$  Hz, 1H), 6.27 (d,  $J = 16.1$  Hz, 1H), 6.17 (d,  $J = 16.1$  Hz, 1H), 6.06 (d,  $J = 15.2$  Hz, 1H), 5.95 (d,  $J = 11.8$  Hz, 1H), 4.01 (appt,  $J = 5.3$  Hz, 1H), 1.92 (s, 3H), 1.91 (s, 3H), 1.81 – 1.70 (m, 3H), 1.68 (s, 3H), 1.40 – 1.32 (m, 1H), 1.04 (s, 3H), 1.02 (s, 9H), 1.01 (s, 3H), 0.14 (s, 3H), 0.12 (s, 3H) ppm.  $^{13}\text{C NMR}$  (100.62 MHz,  $\text{C}_6\text{D}_6$ ):  $\delta$  196.2 (s), 144.1 (s), 140.3 (s), 138.3 (d), 138.0 (d), 132.3 (s), 130.3 (d), 130.2 (d), 129.1 (d), 71.5 (d), 35.6 (t), 34.9 (s), 29.7 (t), 28.8 (q), 28.4 (q), 27.7 (q), 26.2 (q, 3x), 19.1 (q), 18.4 (s), 12.8 (q), -3.9 (q), -4.5 (q) ppm. **HRMS (ESI<sup>+</sup>)**: Calcd. for  $\text{C}_{24}\text{H}_{40}\text{NaO}_2\text{Si}$  [(M+Na)<sup>+</sup>], 411.2687, found 411.2690. **IR (NaCl)**:  $\nu$  2955 (s, C=C), 2922 (s, C=C), 2856 (s, C=C), 1663 (s, C=O), 1580 (s), 1360 (w), 1252 (s), 1154 (w), 1005 (w)  $\text{cm}^{-1}$ .

**(3E,5E,7E)-8-(3-Hydroxy-2,6,6-trimethylcyclohex-1-en-1-yl)-6-methylocta-3,5,7-trien-2-one 1 (4-dihydrotrispurin B)**. (Gessler et al., 2002)

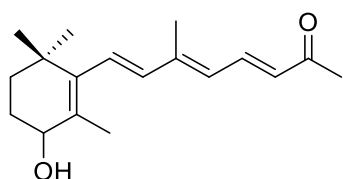

To a solution of (3E,5Z,7E)-8-(3-((*tert*-butyldimethylsilyl)oxy)-2,6,6-trimethylcyclohex-1-en-1-yl)-6-methylocta-3,5,7-trien-2-one **10** (46 mg, 0.12 mmol) in THF (8.4 mL), pyridine (7.0 mL, 865.5 mmol) was added. Then, the mixture was cooled down to 0 °C and HF·Py (6.4 mL) was added, then was stirred at 25 °C for 24h. EtOAc and phosphate buffer were added and the mixture was extracted with EtOAc (3x). The combined organic layers were dried over  $\text{Na}_2\text{SO}_4$  and the solvent was evaporated. The residue was purified by column chromatography (silica gel, from 97:3 *n*-hexane/ $\text{Et}_3\text{N}$  to 60:40 *n*-hexane/EtOAc), to afford 10 mg (32%) of a yellow oil identified as (3E,5E,7E)-8-(3-hydroxy-2,6,6-trimethylcyclohex-1-en-1-yl)-6-methylocta-3,5,7-trien-2-one **1**.  $^1\text{H NMR}$  (400.13 MHz,  $\text{C}_6\text{D}_6$ ):  $\delta$  7.53 (dd,  $J = 15.2, 11.8$  Hz, 1H), 6.24 (d,  $J = 16.1$  Hz, 1H), 6.15 (d,  $J = 16.1$  Hz, 1H), 6.05 (d,  $J = 15.1$  Hz, 1H), 5.98 (d,  $J = 11.8$  Hz, 1H), 3.80 (appt,  $J = 5.2$  Hz, 1H), 1.92 (s, 3H), 1.85 (s, 3H), 1.68 (s, 3H), 1.52 – 1.40 (m, 4H), 1.01 (s, 3H), 0.96 (s, 3H) ppm.

**(2Z,4E)-5-((R)-4-((*tert*-Butyldimethylsilyl)oxy)-2,6,6-trimethylcyclohex-1-en-1-yl)-3-methylpenta-2,4-dien-1-ol 13**. (Ito et al., 1988)

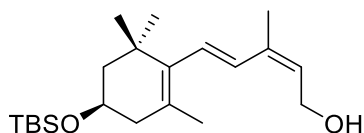

Following the general procedure for the Stille reaction described above, the reaction of (*R*)-4-((*tert*-butyldimethylsilyl)oxy)-2,6,6-trimethylcyclohex-1-en-1-yl trifluoromethanesulfonate **11** (200 mg, 0.50 mmol), Pd<sub>2</sub>(dba)<sub>3</sub>·CHCl<sub>3</sub> (23 mg, 0.025 mmol), AsPh<sub>3</sub> (61 mg, 0.20 mmol), LiCl (63 mg, 1.5 mmol) and (2*Z*,4*E*)-3-methyl-5-(tributylstannyl)penta-2,4-dien-1-ol **12** (230 mg, 0.60 mmol) in NMP (6.5 mL) afford, after purification by column chromatography (silica gel, from 97:3 *n*-hexane/Et<sub>3</sub>N to 80:20 *n*-hexane/EtOAc), 105 mg (60%) of a yellow oil identified as (2*Z*,4*E*)-5-((*R*)-4-((*tert*-butyldimethylsilyl)oxy)-2,6,6-trimethylcyclohex-1-en-1-yl)-3-methylpenta-2,4-dien-1-ol **13**. <sup>1</sup>H NMR (400.13 MHz, C<sub>6</sub>D<sub>6</sub>): δ 6.52 (d, *J* = 16.1 Hz, 1H), 6.17 (d, *J* = 16.1 Hz, 1H), 5.46 (t, *J* = 6.9 Hz, 1H), 4.10 (d, *J* = 6.9 Hz, 2H), 4.08 – 4.04 (m, 1H), 2.36 – 2.18 (m, 2H), 1.80 (s, 3H), 1.78 – 1.69 (m, 1H), 1.71 (s, 3H), 1.70 – 1.69 (m, 1H), 1.10 (s, 3H), 1.06 (s, 3H), 1.04 (s, 9H), 0.15 (s, 3H), 0.14 (s, 3H) ppm. <sup>13</sup>C NMR (100.62 MHz, C<sub>6</sub>D<sub>6</sub>): δ 137.8 (s), 134.5 (s), 130.9 (d), 129.3 (d), 128.2 (d), 127.1 (s), 66.0 (d), 58.5 (t), 49.3 (t), 43.5 (t), 37.1 (s), 30.4 (q), 28.8 (q), 26.2 (q, 3x), 21.7 (d), 20.4 (d), 18.4 (s), -4.3 (q, 2x) ppm.

**(2*Z*,4*E*)-5-((*R*)-4-((*tert*-Butyldimethylsilyl)oxy)-2,6,6-trimethylcyclohex-1-en-1-yl)-3-methylpenta-2,4-dienal **14**.**

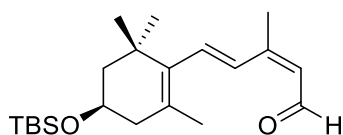

Following the general procedure for the alcohol oxidation, the reaction of (2*Z*,4*E*)-5-((*R*)-4-((*tert*-butyldimethylsilyl)oxy)-2,6,6-trimethylcyclohex-1-en-1-yl)-3-methylpenta-2,4-dien-1-ol **13** (50 mg, 0.14 mmol), MnO<sub>2</sub> (120 mg, 1.4 mmol) and Na<sub>2</sub>CO<sub>3</sub> (150 mg, 1.4 mmol) in THF (1.5 mL) afford, after purification by column chromatography (silica gel, from 97:3 *n*-hexane/Et<sub>3</sub>N to 95:5 *n*-hexane/EtOAc), 49 mg (99%) of a yellow oil identified as (2*Z*,4*E*)-5-((*R*)-4-((*tert*-butyldimethylsilyl)oxy)-2,6,6-trimethylcyclohex-1-en-1-yl)-3-methylpenta-2,4-dienal **14**. [α]<sub>D</sub><sup>24</sup> -50.0 (*c* 0.43, MeOH). <sup>1</sup>H NMR (400.13 MHz, C<sub>6</sub>D<sub>6</sub>): δ 10.13 (d, *J* = 7.4 Hz, 1H), 7.02 (d, *J* = 16.1 Hz, 1H), 6.31 (d, *J* = 16.1

Hz, 1H), 5.78 (d,  $J = 7.3$  Hz, 1H), 4.03 (dddd,  $J = 11.4, 9.6, 5.8, 3.7$  Hz, 1H), 2.33 – 2.09 (m, 2H), 1.75 (ddd,  $J = 12.4, 3.8, 1.9$  Hz, 1H), 1.65 – 1.60 (m, 1H), 1.59 (s, 3H), 1.56 (s, 3H), 1.04 (s, 9H), 1.02 (s, 3H), 0.97 (s, 3H), 0.15 (s, 3H), 0.14 (s, 3H) ppm.  $^{13}\text{C}$  NMR (100.62 MHz,  $\text{C}_6\text{D}_6$ ):  $\delta$  188.8 (d), 152.8 (s), 136.9 (s), 135.0 (d), 129.7 (s), 129.2 (d), 128.6 (d), 65.7 (d), 49.2 (t), 43.6 (t), 37.0 (s), 30.2 (q), 28.7 (q), 26.2 (q, 3x), 21.7 (q), 20.6 (q), 18.4 (s), -4.3 (q, 2x) ppm. HRMS (ESI<sup>+</sup>): Calcd. for  $\text{C}_{21}\text{H}_{37}\text{O}_2\text{Si}$  [(M+H)<sup>+</sup>], 349.2554, found 349.2557. IR (NaCl):  $\nu$  2955 (s, C=C), 2926 (s, C=C), 2855 (s, C=C), 1669 (s, C=O), 1613 (w), 1361 (w), 1255 (w), 1115 (w), 1084 (s), 836 (w)  $\text{cm}^{-1}$ .

**(3E,5Z,7E)-8-((R)-4-((tert-Butyldimethylsilyl)oxy)-2,6,6-trimethylcyclohex-1-en-1-yl)-6-methylocta-3,5,7-trien-2-one 15.**

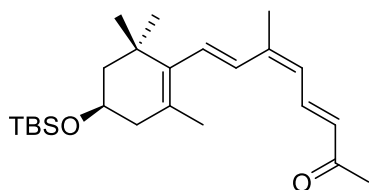

Following the general procedure for the aldol reaction, the reaction of (2Z,4E)-5-((R)-4-((tert-butyl dimethylsilyl)oxy)-2,6,6-trimethylcyclohex-1-en-1-yl)-3-methylpenta-2,4-dienal **14** (48 mg, 0.14 mmol) with NaOH (0.013 mL, 0.013 mmol, 1M) in acetone (0.70 mL) afford, after purification by column chromatography (silica gel, from 97:3 *n*-hexane/Et<sub>3</sub>N to 95:5 *n*-hexane/EtOAc), 43 mg (79%) of a yellow oil identified as (3E,5Z,7E)-8-((R)-4-((tert-butyl dimethylsilyl)oxy)-2,6,6-trimethylcyclohex-1-en-1-yl)-6-methylocta-3,5,7-trien-2-one **15**.  $[\alpha]_{\text{D}}^{24}$  -90.7 (*c* 0.26, MeOH).  $^1\text{H}$  NMR (400.13 MHz,  $\text{C}_6\text{D}_6$ ):  $\delta$  7.75 (dd,  $J = 15.2, 11.8$  Hz, 1H), 6.84 (d,  $J = 16.0$  Hz, 1H), 6.29 (d,  $J = 16.0$  Hz, 1H), 6.00 (d,  $J = 15.1$  Hz, 1H), 5.87 (d,  $J = 11.8$  Hz, 1H), 4.14 – 3.96 (m, 1H), 2.35 – 2.12 (m, 2H), 1.86 (s, 3H), 1.79 (s, 3H), 1.75 (dd,  $J = 3.7, 1.8$  Hz, 1H), 1.69 – 1.67 (m, 1H), 1.65 (s, 3H), 1.06 (s, 3H), 1.04 (s, 9H), 1.03 (s, 3H), 0.14 (s, 3H), 0.13 (s, 3H) ppm.  $^{13}\text{C}$  NMR (100.62 MHz,  $\text{C}_6\text{D}_6$ ):  $\delta$  196.3 (s), 142.9 (s), 137.5 (s), 136.6 (d), 131.3 (d), 130.1 (d), 129.8 (d), 128.6 (s), 127.4 (d), 65.8 (d), 49.2 (t), 43.5 (t), 37.1 (s), 30.3 (q), 28.8 (q), 27.6 (q), 26.2 (q, 3x), 21.7 (q), 20.9 (q), 18.4 (s), -4.3 (q, 2x) ppm. HRMS (ESI<sup>+</sup>): Calcd. for  $\text{C}_{24}\text{H}_{41}\text{O}_2\text{Si}$  [(M+H)<sup>+</sup>], 389.2868, found 389.2870. IR (NaCl):  $\nu$  2955 (s, C=C), 2927 (s, C=C), 2856 (s, C=C), 1661 (s, C=O), 1588 (s), 1462 (w), 1361 (w), 1252 (s), 1083 (s), 973 (w)  $\text{cm}^{-1}$ .



**(3E,5Z,7E)-8-((R)-4-Hydroxy-2,6,6-trimethylcyclohex-1-en-1-yl)-6-methylocta-3,5,7-trien-2-one 2** and **(3E,5E,7E)-8-((R)-4-Hydroxy-2,6,6-trimethylcyclohex-1-en-1-yl)-6-methylocta-3,5,7-trien-2-one 3**. (Maoka et al., 2001)

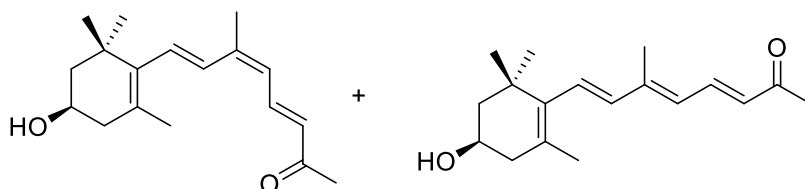

To a cooled (0 °C) solution of **(3E,5Z,7E)-8-((R)-4-((tert-butyl)dimethylsilyloxy)-2,6,6-trimethylcyclohex-1-en-1-yl)-6-methylocta-3,5,7-trien-2-one 15** (43 mg, 0.11 mmol) in THF (1.0 mL), TBAF (0.17 mL, 1M in THF, 0.17 mmol) was added. The mixture was stirred for 3.5h at 25 °C. Then, Et<sub>2</sub>O was added and washed with an aqueous solution of NaHCO<sub>3</sub>. The aqueous layer was extracted with Et<sub>2</sub>O (3x) and the combined organic layers were washed with brine, dried over Na<sub>2</sub>SO<sub>4</sub> and the solvent was evaporated. The residue was purified by column chromatography (silica gel, from 97:3 *n*-hexane/Et<sub>3</sub>N to 40:60 *n*-hexane/EtOAc), to afford 14 mg (47%) of a yellow oil identified as **(3E,5Z,7E)-8-((R)-4-hydroxy-2,6,6-trimethylcyclohex-1-en-1-yl)-6-methylocta-3,5,7-trien-2-one 2** and 14 mg (47%) of a yellow oil identified as **(3E,5E,7E)-8-((R)-4-hydroxy-2,6,6-trimethylcyclohex-1-en-1-yl)-6-methylocta-3,5,7-trien-2-one 3**.

Data for **(3E,5Z,7E)-8-((R)-4-Hydroxy-2,6,6-trimethylcyclohex-1-en-1-yl)-6-methylocta-3,5,7-trien-2-one 2**.  $[\alpha]_D^{26}$  -16.9 (*c* 0.09, MeOH). <sup>1</sup>H NMR (400.13 MHz, C<sub>6</sub>D<sub>6</sub>): δ 7.75 (dd, *J* = 15.1, 11.9 Hz, 1H), 6.82 (d, *J* = 16.0 Hz, 1H), 6.27 (d, *J* = 16.0 Hz, 1H), 5.99 (d, *J* = 15.1 Hz, 1H), 5.86 (d, *J* = 11.9 Hz, 1H), 3.80 – 3.73 (m, 1H), 2.20 – 2.14 (m, 1H), 1.96 - 1.89 (m, 1H), 1.86 (s, 3H), 1.77 (s, 3H), 1.62 (s, 3H), 1.60 – 1.50 (m, 1H), 1.43 – 1.37 (m, 1H), 1.01 (s, 3H), 0.99 (s, 3H) ppm. <sup>13</sup>C NMR (100.62 MHz, C<sub>6</sub>D<sub>6</sub>): δ 196.4 (s), 143.1 (s), 137.9 (s), 137.4 (s), 136.6 (d), 131.3 (d), 130.1 (d), 129.7 (d), 127.4 (d), 64.5 (d), 48.7 (t), 42.8 (t), 37.0 (s), 30.4 (q), 28.8 (q), 27.7 (q), 21.7 (q), 20.9 (q) ppm.

Data for **(3E,5E,7E)-8-((R)-4-Hydroxy-2,6,6-trimethylcyclohex-1-en-1-yl)-6-methylocta-3,5,7-trien-2-one 3**.  $[\alpha]_D^{25}$  +5.2 (*c* 0.22, MeOH). <sup>1</sup>H NMR (400.13 MHz,

C<sub>6</sub>D<sub>6</sub>):  $\delta$  7.54 (dd,  $J = 15.2, 11.7$  Hz, 1H), 6.23 (d,  $J = 16.0$  Hz, 1H), 6.12 (d,  $J = 16.1$  Hz, 1H), 6.05 (d,  $J = 15.2$  Hz, 1H), 5.99 (d,  $J = 11.5$  Hz, 1H), 3.81 – 3.73 (m, 1H), 2.24 – 2.17 (m, 1H), 1.99 – 1.93 (m, 1H), 1.92 (s, 3H), 1.68 (s, 3H), 1.64 (s, 3H), 1.62 – 1.58 (m, 2H), 1.02 (s, 6H) ppm. <sup>13</sup>C NMR (100.62 MHz, C<sub>6</sub>D<sub>6</sub>):  $\delta$  196.2 (s), 144.2 (s), 138.0 (d), 137.9 (d), 137.5 (s), 130.2 (d), 129.9 (d), 128.9 (d), 128.7 (s), 64.5 (d), 48.8 (t), 42.9 (t), 37.1 (s), 30.4 (q), 28.8 (q), 27.8 (q), 21.7 (q), 12.7 (q) ppm.

**(2E,4E)-5-(1R)-4-((tert-Butyldimethylsilyl)oxy)-2,6,6-trimethylcyclohex-1-en-1-yl)-3-methylpenta-2,4-dien-1-ol 17.** (Domínguez et al., 2006)

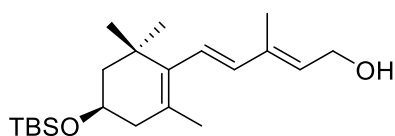

Following the general procedure for the Stille reaction, the reaction of (*R*)-4-((*tert*-butyldimethylsilyl)oxy)-2,6,6-trimethylcyclohex-1-en-1-yl trifluoromethanesulfonate **11** (0.40 g, 1.0 mmol), (*2E,4E*)-3-methyl-5-(tributylstannyl)penta-2,4-dien-1-ol **16** (0.46 g, 1.2 mmol), Pd<sub>2</sub>(dba)<sub>3</sub>·CHCl<sub>3</sub> (0.005 g, 0.05 mmol), AsPh<sub>3</sub> (0.12 g, 0.4 mmol) and LiCl (0.13 g, 3.0 mmol) in NMP (13 mL) afford, after purification by column chromatography (silica gel, from 97:3 *n*-hexane/Et<sub>3</sub>N to *n*-hexane/EtOAc 80:20), 0.206 g (59%) of a yellow oil identified as (*2E,4E*)-5-(1*R*)-4-((*tert*-butyldimethylsilyl)oxy)-2,6,6-trimethylcyclohex-1-en-1-yl)-3-methylpenta-2,4-dien-1-ol **17**. <sup>1</sup>H NMR (400.13 MHz, C<sub>6</sub>D<sub>6</sub>):  $\delta$  6.16 – 6.07 (m, 2H), 5.60 – 5.52 (m, 1H), 4.09 (dddd,  $J = 11.6, 9.5, 5.8, 3.7$  Hz, 1H), 4.02 (d,  $J = 6.7$  Hz, 2H), 2.42 – 2.19 (m, 2H), 1.80 (ddd,  $J = 12.3, 3.7, 1.9$  Hz, 1H), 1.72 (s, 3H), 1.69 – 1.65 (m, 1H), 1.63 (s, 3H), 1.11 (s, 3H), 1.08 (s, 3H), 1.05 (s, 9H), 0.15 (s, 3H), 0.14 (s, 3H) ppm. <sup>13</sup>C NMR (100.62 MHz, C<sub>6</sub>D<sub>6</sub>):  $\delta$  138.5 (d), 137.6 (s), 135.6 (s), 130.8 (d), 126.7 (s), 125.9 (d), 66.1 (d), 59.4 (t), 49.3 (t), 43.4 (t), 37.2 (s), 30.4 (q), 28.8 (q), 26.2 (q, 3x), 21.7 (q), 18.4 (s), 12.4 (q), -4.3 (q, 2x) ppm.

**(2E,4E)-5-((R)-4-((tert-Butyldimethylsilyl)oxy)-2,6,6-trimethylcyclohex-1-en-1-yl)-3-methylpenta-2,4-dienal 18.** (Domínguez et al., 2006)

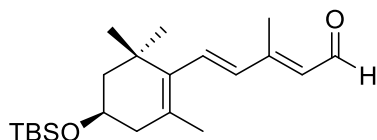

Following the general procedure for the alcohol oxidation, the reaction of (2*E*,4*E*)-5-((1*R*)-4-((*tert*-butyldimethylsilyl)oxy)-2,6,6-trimethylcyclohex-1-en-1-yl)-3-methylpenta-2,4-dien-1-ol **17** (0.055 g, 0.16 mmol), MnO<sub>2</sub> (0.14 g, 1.6 mmol) and Na<sub>2</sub>CO<sub>3</sub> (0.17 g, 1.6 mmol) in THF (1.5 mL) afford, after purification by column chromatography (silica gel, from 97:3 *n*-hexane/Et<sub>3</sub>N to 95:5 *n*-hexane/EtOAc), 0.053 g (96%) of a yellow oil identified as (2*E*,4*E*)-5-((*R*)-4-((*tert*-butyldimethylsilyl)oxy)-2,6,6-trimethylcyclohex-1-en-1-yl)-3-methylpenta-2,4-dienal **18**. <sup>1</sup>H NMR (400.13 MHz, C<sub>6</sub>D<sub>6</sub>): δ 10.0 (d, *J* = 7.7 Hz, 1H), 6.38 (d, *J* = 16.1 Hz, 1H), 5.96 (d, *J* = 16.1 Hz, 1H), 5.91 (d, *J* = 7.8 Hz, 1H), 4.01 (dddd, *J* = 12.6, 9.3, 5.8, 3.6 Hz, 1H), 2.27 (dd, *J* = 17.1, 5.6 Hz, 1H), 2.15 (dd, *J* = 17.4, 9.2 Hz, 1H), 1.77 -1.74 (m, 1H), 1.72 (s, 3H), 1.63 – 1.56 (m, 1H), 1.54 (s, 3H), 1.04 (s, 9H), 1.0 (s, 3H), 0.97 (s, 3H), 0.14 (s, 3H), 0.13 (s, 3H) ppm. <sup>13</sup>C NMR (100.62 MHz, C<sub>6</sub>D<sub>6</sub>): δ 189.9 (d), 152.8 (s), 137.0 (d), 136.9 (s), 133.8 (d), 129.7 (d), 129.5 (s), 65.7 (d), 49.2 (t), 43.5 (t), 37.1 (s), 30.2 (q), 28.7 (q), 26.2 (q, 3x), 21.6 (q), 18.4 (s), 12.4 (q), -4.3 (q, 2x) ppm.

**(3*E*,5*E*,7*E*)-8-((*R*)-4-((*tert*-Butyldimethylsilyl)oxy)-2,6,6-trimethylcyclohex-1-en-1-yl)-6-methylocta-3,5,7-trien-2-one **19**.**

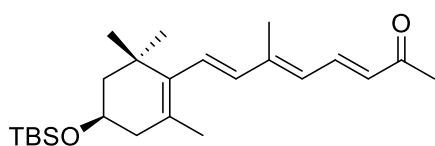

Following the general procedure for the aldol reaction, the reaction of 2*E*,4*E*)-5-((*R*)-4-((*tert*-butyldimethylsilyl)oxy)-2,6,6-trimethylcyclohex-1-en-1-yl)-3-methylpenta-2,4-dienal **18** (0.17 g, 0.50 mmol), NaOH (0.045 mL, 1M in H<sub>2</sub>O, 0.045 mmol) in acetone (2.5 mL) afford, after purification by column chromatography (silica gel, from 97:3 *n*-hexane/Et<sub>3</sub>N to 95:5 *n*-hexane/EtOAc), 0.15 g (76%) of a yellow oil identified as (3*E*,5*E*,7*E*)-8-((*R*)-4-((*tert*-butyldimethylsilyl)oxy)-2,6,6-trimethylcyclohex-1-en-1-yl)-6-methylocta-3,5,7-trien-2-one **19**. [α]<sub>D</sub><sup>25</sup> -80.1 (*c* 0.44, MeOH). <sup>1</sup>H NMR (400.13 MHz, C<sub>6</sub>D<sub>6</sub>): δ 7.54 (dd, *J* = 15.2, 11.7 Hz, 1H), 6.25 (d, *J* = 16.2 Hz, 1H), 6.14 (d, *J* = 16.2 Hz, 1H), 6.05 (d, *J* = 15.2 Hz, 1H), 5.99 (d, *J* = 11.7 Hz, 1H), 4.16 – 4.0 (m, 1H),

2.33 (dd,  $J = 17.3, 5.8$  Hz, 1H), 2.28 – 2.16 (m, 1H), 1.92 (s, 3H), 1.82 – 1.75 (m, 1H), 1.68 (s, 3H), 1.67 (s, 3H), 1.43 – 1.33 (m, 1H), 1.08 (s, 3H), 1.04 (s, 12H, Si-(CH<sub>3</sub>)<sub>3</sub> + CH<sub>3</sub>), 0.15 (s, 3H), 0.14 (s, 3H) ppm. <sup>13</sup>C NMR (100.62 MHz, C<sub>6</sub>D<sub>6</sub>): δ 196.3 (s), 144.3 (s), 138.0 (d), 137.9 (d), 137.5 (s), 130.2 (d), 129.9 (d), 128.9 (d), 127.9 (s), 65.9 (d), 49.3 (t), 43.6 (t), 37.2 (s), 30.4 (q), 28.8 (q), 27.8 (q), 26.2 (q, 3x), 21.8 (q), 18.4 (s), 12.5 (q), -4.1 (q), -4.2 (q) ppm. HRMS (ESI<sup>+</sup>): Calcd. for C<sub>24</sub>H<sub>41</sub>O<sub>2</sub>Si [(M+H)<sup>+</sup>], 389.2868, found 389.2870. IR (NaCl): ν 2955 (s, C=C), 2927 (s, C=C), 2856 (s, C=C), 1661 (s, C=O), 1589 (s), 1361 (w), 1251 (s), 1083 (s), 974 (w), 836 (w) cm<sup>-1</sup>.

**(3E,5E,7E)-8-((R)-4-((tert-Butyldimethylsilyl)oxy)-2,6,6-trimethylcyclohex-1-en-1-yl)-6-methylocta-3,5,7-trien-2-ol 20.**

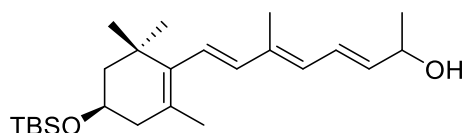

To a cooled (0 °C) solution of (3E,5E,7E)-8-((R)-4-((tert-butylidimethylsilyl)oxy)-2,6,6-trimethylcyclohex-1-en-1-yl)-6-methylocta-3,5,7-trien-2-one **19** (0.05 g, 0.13 mmol) and CeCl<sub>3</sub>·7H<sub>2</sub>O (0.06 g, 0.16 mmol) in ethanol (1.30 mL), NaBH<sub>4</sub> (0.005 g, 0.13 mmol) was added. The mixture was stirred at 0 °C for 1h. Then, a saturated solution of NH<sub>4</sub>Cl was added and the mixture was extracted with Et<sub>2</sub>O (3x). The combined organic layers were dried over Na<sub>2</sub>SO<sub>4</sub>, filtered and concentrated under reduced pressure. The residue was purified by column chromatography (silica gel, from 97:3 *n*-hexane/Et<sub>3</sub>N to 80:20 *n*-hexane/EtOAc), to afford 0.030 g (60%) of a yellow oil identified as (3E,5E,7E)-8-((R)-4-((tert-butylidimethylsilyl)oxy)-2,6,6-trimethylcyclohex-1-en-1-yl)-6-methylocta-3,5,7-trien-2-ol **20**. [ $\alpha$ ]<sub>D</sub><sup>25</sup> -33.7 (*c* 0.48, MeOH). <sup>1</sup>H NMR (400.13 MHz, C<sub>6</sub>D<sub>6</sub>): δ 6.57 (dd,  $J = 15.2, 11.3$  Hz, 1H), 6.25 (d,  $J = 16.1$  Hz, 1H), 6.17 (d,  $J = 16.1$  Hz, 1H), 6.10 (d,  $J = 11.3$  Hz, 1H), 5.64 (dd,  $J = 15.0, 6.1$  Hz, 1H), 4.17 – 4.05 (m, 2H), 2.39 – 2.32 (m, 2H), 1.83 (s, 3H), 1.80 – 1.78 (m, 1H), 1.75 (s, 3H), 1.72 – 1.65 (m, 1H), 1.14 – 1.13 (m, 6H), 1.10 (s, 3H), 1.09 (s, 9H), 0.15 (s, 3H), 0.14 (s, 3H) ppm. <sup>13</sup>C NMR (100.62 MHz, C<sub>6</sub>D<sub>6</sub>): δ 138.9 (d), 138.6 (d), 137.9 (s), 135.4 (s), 130.4 (d), 126.9 (s), 126.1 (d), 125.7 (d), 68.5 (d), 66.1 (d), 49.4 (t), 43.6 (t), 37.3 (s), 30.4 (q), 28.8 (q), 26.2 (q, 3x), 23.8 (q), 21.8 (q), 18.4 (s), 12.6 (q), -4.3 (q, 2x) ppm. IR (NaCl): ν 3600-3000 (s, OH), 2955 (s, C=C), 2928 (s, C=C), 2856 (s, C=C), 1462 (w), 1254 (w), 1083 (w) cm<sup>-1</sup>.

**(R)-4-((1E,3E,5E)-7-Hydroxy-3-methylocta-1,3,5-trien-1-yl)-3,5,5-trimethylcyclohex-3-en-1-ol 4.**

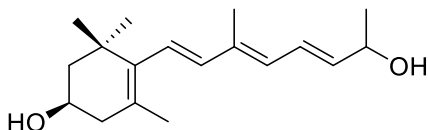

Following the general procedure for alcohol deprotection, the reaction of (3E,5E,7E)-8-((R)-4-((tert-butyldimethylsilyloxy)-2,6,6-trimethylcyclohex-1-en-1-yl)-6-methylocta-3,5,7-trien-2-ol **20** (0.030 g, 0.077 mmol) and TBAF (0.35 mL, 1M in THF, 0.35 mmol) in THF (1.0 mL) afford, after purification by column chromatography (silica gel, from 97:3 *n*-hexane/Et<sub>3</sub>N to 60:40 *n*-hexane/EtOAc), 0.009 g (43%) of a yellow oil identified as

(R)-4-((1E,3E,5E)-7-hydroxy-3-methylocta-1,3,5-trien-1-yl)-3,5,5-trimethylcyclohex-3-en-1-ol **4**. [ $\alpha$ ]<sub>D</sub><sup>25</sup> -61.5 (*c* 0.1, MeOH). <sup>1</sup>H NMR (400.13 MHz, C<sub>6</sub>D<sub>6</sub>):  $\delta$  6.56 (dd, *J* = 15.0, 11.2 Hz, 1H), 6.22 (d, *J* = 16.1 Hz, 1H), 6.15 (d, *J* = 16.1 Hz, 1H), 6.09 (d, *J* = 11.2 Hz, 1H), 5.64 (dd, *J* = 15.1, 6.2 Hz, 1H), 4.13 (t, *J* = 6.5 Hz, 1H), 3.89 – 3.76 (m, 1H), 2.23 (dd, *J* = 17.0, 5.8 Hz, 1H), 1.98 (dd, *J* = 17.0, 9.7 Hz, 1H), 1.82 (s, 3H), 1.71 (s, 3H), 1.69 – 1.58 (m, 1H), 1.49 – 1.36 (m, 1H), 1.14 (d, *J* = 6.4 Hz, 3H), 1.07 (s, 3H), 1.06 (s, 3H) ppm. <sup>13</sup>C NMR (100.62 MHz, C<sub>6</sub>D<sub>6</sub>):  $\delta$  138.9 (d), 138.6 (d), 137.9 (s), 135.4 (s), 130.4 (d), 126.6 (s), 126.1 (d), 125.7 (d), 68.5 (d), 64.7 (d), 48.9 (t), 42.9 (t), 37.2 (s), 30.4 (q), 28.8 (q), 23.8 (q), 21.7 (q), 12.6 (q) ppm. HRMS (ESI<sup>+</sup>): Calcd. for C<sub>18</sub>H<sub>28</sub>NaO<sub>2</sub> [(M+Na)<sup>+</sup>], 299.1982, found 299.1982. IR (NaCl):  $\nu$  3600-3000 (s, OH), 2962 (s, C=C), 2923 (s, C=C), 1451 (w), 1362 (w), 1140 (w), 969 (w) cm<sup>-1</sup>.

**(2E,4E)-5-((R)-4-Methoxy-2,6,6-trimethylcyclohex-1-en-1-yl)-3-methylpenta-2,4-dien-1-ol 22.**

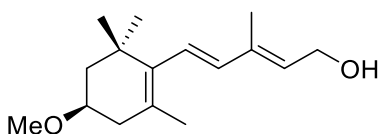

Following the general procedure for the Stille reaction, the reaction of (R)-2-iodo-5-methoxy-1,3,3-trimethylcyclohex-1-ene **21** (0.20 g, 0.71 mmol), (2E,4E)-3-methyl-5-(tributylstannyl)penta-2,4-dien-1-ol **16** (0.33 g, 0.86 mmol), Pd<sub>2</sub>(dba)<sub>3</sub>·CHCl<sub>3</sub> (0.037 g, 0.04 mmol), AsPh<sub>3</sub> (0.087 g, 0.28 mmol) and LiCl (0.12 g, 2.84 mmol) in NMP (9 mL)

afforded, after purification by column chromatography (silica gel, from 97:3 *n*-hexane/Et<sub>3</sub>N to 80:20 *n*-hexane/EtOAc), 0.058 g (33%) of a yellow oil identified as (2*E*,4*E*)-5-((*R*)-4-methoxy-2,6,6-trimethylcyclohex-1-en-1-yl)-3-methylpenta-2,4-dien-1-ol **22**. <sup>1</sup>H NMR (400.13 MHz, C<sub>6</sub>D<sub>6</sub>): δ 6.16 – 6.07 (m, 2H), 5.57 (t, *J* = 6.4 Hz, 1H), 4.03 (d, *J* = 6.7 Hz, 2H), 3.48 (dddd, *J* = 11.5, 9.2, 5.7, 3.5 Hz, 1H), 3.23 (s, 3H), 2.41 – 2.32 (m, 2H), 2.16 – 2.06 (m, 1H), 1.90 (ddd, *J* = 12.3, 3.5, 1.9 Hz, 1H), 1.71 (s, 3H), 1.63 (s, 3H), 1.08 (6, 6H) ppm.

(2*E*,4*E*)-5-((*R*)-4-Methoxy-2,6,6-trimethylcyclohex-1-en-1-yl)-3-methylpenta-2,4-dienal **23**.

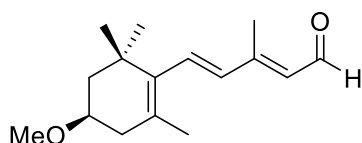

Following the general procedure for the oxidation of allylic alcohols, the reaction of (2*E*,4*E*)-5-((*R*)-4-methoxy-2,6,6-trimethylcyclohex-1-en-1-yl)-3-methylpenta-2,4-dien-1-ol **22** (0.058 g, 0.23 mmol), MnO<sub>2</sub> (0.36 g, 4.17 mmol) and Na<sub>2</sub>CO<sub>3</sub> (0.44 g, 4.17 mmol) in THF (3.5 mL) afforded, after purification by column chromatography (silica gel, from 97:3 *n*-hexane/Et<sub>3</sub>N to 95:5 *n*-hexane/EtOAc), 0.030 g (53%) of a yellow oil, which was identified as (2*E*,4*E*)-5-((*R*)-4-methoxy-2,6,6-trimethylcyclohex-1-en-1-yl)-3-methylpenta-2,4-dienal **23**. <sup>1</sup>H NMR (400.13 MHz, C<sub>6</sub>D<sub>6</sub>): δ 10.0 (d, *J* = 7.7 Hz, 1H), 6.38 (d, *J* = 16.2 Hz, 1H), 5.96 (d, *J* = 16.2 Hz, 1H), 5.91 (d, *J* = 8.4 Hz, 1H), 3.40 (dddd, *J* = 11.3, 9.2, 5.6, 3.4 Hz, 1H), 3.21 (s, 3H), 2.29 (dd, *J* = 17.3, 5.7 Hz, 1H), 2.04 (dd, *J* = 17.5, 9.3 Hz, 1H), 1.83 (ddd, *J* = 12.4, 3.5, 1.9 Hz, 1H), 1.71 (s, 3H), 1.53m (s, 3H), 1.16 – 1.08 (m, 1H), 0.97 (s, 6H) ppm.

#### ***O*-Methylzaxinone 24**

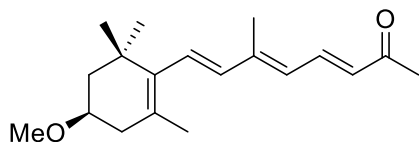

Following the general procedure for the aldol condensation, the reaction of (2*E*,4*E*)-5-((*R*)-4-methoxy-2,6,6-trimethylcyclohex-1-en-1-yl)-3-methylpenta-2,4-dienal **23** (0.030 g, 0.12 mmol), NaOH (0.011 mL, 1M in H<sub>2</sub>O, 0.011 mmol) in acetone (1.5 mL) afforded, after purification by flash column chromatography (silica gel, from 97:3 *n*-hexane/Et<sub>3</sub>N to 95:5 *n*-hexane/EtOAc), 0.025 g (74%) of a yellow oil, which was identified as *O*-methylzaxinone **24**. <sup>1</sup>H NMR (400.13 MHz, C<sub>6</sub>D<sub>6</sub>): δ 7.54 (dd, *J* = 15.1, 11.7 Hz, 1H),

6.26 (d,  $J = 16.1$  Hz, 1H), 6.14 (d,  $J = 16.1$  Hz, 1H), 6.06 (d,  $J = 15.3$  Hz, 1H), 6.00 (d,  $J = 11.9$  Hz, 1H), 3.45 (dddd,  $J = 11.5, 9.1, 5.6, 3.4$  Hz, 1H), 3.22 (s, 3H), 2.36 – 2.32 (m, 1H), 2.11 (dd,  $J = 17.2, 9.2$  Hz, 1H), 1.93 (s, 3H), 1.91 – 1.84 (m, 1H), 1.69 (s, 3H), 1.66 (s, 3H), 1.51 – 1.48 (m, 1H), 1.05 (s, 6H) ppm.

## Supplemental References

- Alvarez, R., Vaz, B., Gronemeyer, H., and de Lera, A.R. (2014). Functions, therapeutic applications, and synthesis of retinoids and carotenoids. *Chem. Rev.* **114**:1-125.
- Domínguez, M., Alvarez, R., Borrás, E., Farrés, J., Parés, X., and de Lera, A.R. (2006). Synthesis of Enantiopure C3- and C4-Hydroxyretinals and Their Enzymatic Reduction by ADH8 from *Xenopus laevis*. *Org. Biomol. Chem.* **4**:155-164.
- Fontán, N., Domínguez, M., Álvarez, R., and de Lera, A.R. (2011). Synthesis of C40-Symmetrical Fully Conjugated Carotenoids by Olefin Metathesis. *Eur. J. Org. Chem.* 2011:6704-6712.
- Gessler, N.N., Sokolov, A.V., and Belozerskaya, T.A. (2002). Initial Stages of Trisporic Acid Synthesis in *Blakeslea trispora*. *App. Biochem. Microbiol.* **38**:536-543.
- Haag, A., and Eugster, C.H. (1982). Isozeaxanthine: Chiralität und enantioselektive Synthese von (4R,4'R)-Isozeaxanthin ((-)-(4R, 4'R)- $\beta$ ,  $\beta$ -Carotin-4,4'-diol). *Helv. Chim. Acta* **65**:1795-1803.
- Ito, M., Hirata, Y., Shibata, Y., and Tsukida, K. (1990). Synthesis of the 4-alkylidenebutenolide carotenoids, peridinin and pyrroloxanthin. *J. Chem. Soc., Perkin Trans.* **1**:197-199.
- Ito, M., Matsuoka, N., Tsukida, K., and Seki, T. (1988). Retinoids and Related Compounds. X. : Synthesis of Geometrical Isomers of ( $\pm$ )-2- and ( $\pm$ )-3-Hydroxyretinals and Identification of the Chromophore of the Fly Visual Pigment. *Chem. Pharm. Bull.* **36**:78-86.
- Katsuta, Y., et al. (1994). Synthesis of 9E- and 9Z-Locked Retinoic Acid Analogs as Ligands for RAR and RXR. *Chem. Pharm. Bull.* **42**:2659-2661.
- Maoka, T., Fujiwara, Y., Hashimoto, K., and Akimoto, N. (2001). Isolation of a Series of Apocarotenoids from the Fruits of the Red Paprika *Capsicum annum* L. *J. Agr. Food Chem.* **49**:1601-1606.
- Tanumihardjo, S.A. (2001). Synthesis of 10,11,14,15- $^{13}\text{C}_4$ -and 14,15- $^{13}\text{C}_2$ -retinyl acetate. *J. Labelled Compd. Radiopharm.* **44**:365-372.
- Yamano, Y., and Ito, M. (1993). First total synthesis of ( $\pm$ )-peridinin, ( $\pm$ )-pyrroloxanthin and the optically active peridinin. *J. Chem. Soc. Perkin Trans.* **1**:1599-1610.

Yamano, Y., Sumiya, S., and Ito, M. (1995). Carotenoids and related polyenes. Part 2. Photoisomerization of an allenic carotenoid, peridinin, and allenic model compounds. *J. Chem. Soc, Perkin Trans. 1*:167-176.
